# Supplementary material for: Efficient removal of arsenate by versatile magnetic graphene oxide composites
Source: Royal Society of Chemistry journal article supplement (doi:10.1039/c2ra21623j), 2012-01-01
Supplement: c2ra21623j.pdf [file c2ra21623j.pdf]

## **Supplementary Information**

### **Efficient Removal of Arsenate by a Versatile Magnetic Graphene Oxide Composites**

Guodong Sheng<sup>a,b</sup>, Yimin Li<sup>a</sup>, Xin Yang<sup>b</sup>, Xuemei Ren<sup>b</sup>, Shitong Yang<sup>b</sup>, Jun Hu<sup>b</sup>,

Xiangke Wang<sup>b\*</sup>

<sup>a</sup>School of Chemistry and Chemical Engineering, Shaoxing University, Huancheng  
West Road 508, Shaoxing, Zhejiang 312000, P.R. China

<sup>b</sup>Key Laboratory of Novel Thin Film Solar Cells, Institute of Plasma Physics, Chinese  
Academy of Sciences, P.O. Box 1126, Hefei, 230031, P.R. China

## List of Supporting Figures

Fig. S1. (A) SEM and (B) TEM images of the GO sample.<sup>4, 5</sup>

Fig. S2. XRD pattern of the MGO composites.<sup>6</sup>

Fig. S3. FTIR spectra of the MGO composites<sup>6</sup> and GO samples.

Fig. S4. Magnetization curve at room temperature of the MGO composites (Inset being separation of particles of MGO).<sup>6</sup>

Fig. S5. Magnetic separation experiment of the MGO composites.

Fig. S6. The results of ferric ion dissolution experiment of the MGO composites as a function of solution pH,  $[MGO]_0=5$  g/L.

Fig. S7. Adsorption of As(V) on MGO at pH 5.0 and 6.5 in the absence and presence of coexisting cations with various concentrations,  $T=298$  K,  $C_{[As(V)]}=25$  mg/L,  $m/V=0.4$  g/L, (A)  $K^+$ , (B)  $Na^+$ , (C)  $Ca^{2+}$ , (D)  $Mg^{2+}$ , (E)  $Al^{3+}$ , (F)  $Fe^{3+}$ .

Fig. S8. Adsorption of cations ( $K^+$ ,  $Na^+$ ,  $Ca^{2+}$ ,  $Mg^{2+}$ ,  $Al^{3+}$ ,  $Fe^{3+}$ ) on MGO.

Fig. S9. Impact of adsorbent content on adsorption percentage and adsorption capacity of As(V) adsorption on MGO,  $C_{[As(V)]}=25$  mg/L,  $T=298$  K, (A) pH=5.0, (B) pH=6.5.

Fig. S10. Impact of adsorbent content on equilibrium concentration and distribution coefficient of As(V) adsorption on MGO,  $C_{[As(V)]}=25$  mg/L,  $T=298$  K, (A) pH=5.0, (B) pH=6.5.

### List of Supporting Tables

Table S1. Kinetic parameters of As(V) adsorption on MGO at pH=5.0 and 6.5.

Table S2. Langmuir and Freundlich fitting parameters of As(V) adsorption on MGO.

Table S3. Comparison of adsorption capacity of GO and MGO with other adsorbents for As(V).

Table S4. Constants of linear fit of  $\ln K_d$  vs.  $q_e$  ( $\ln K_d = A + Bq_e$ ) for As(V) adsorption on MGO.

Table S5. Values of thermodynamic parameters for the adsorption of As(V) on MGO.

Table S6. The initial pH and final pH in the adsorption system of As(V) onto MGO.

Table S7. Adsorption of As(V) on MGO at pH 5.0 and 6.5 in the absence and presence of inorganic anions with various concentrations, T=298 K,  $C_{[As(V)]}=25$  mg/L, m/V=0.4 g/L.

Table S8. Adsorption of As(V) on MGO at pH 5.0 and 6.5 in the absence and presence of organic anions with various concentrations, T=298 K,  $C_{[As(V)]}=25$  mg/L, m/V=0.4 g/L.

Table S9. Adsorption of As(V) on MGO at pH 5.0 and 6.5 in the absence and presence of coexisting cations with various concentrations, T=298 K,  $C_{[As(V)]}=25$  mg/L, m/V=0.4 g/L.

**Preparation of GO and MGO Composites.** Graphene oxide (GO) was prepared from natural graphite by the modified Hummers method.<sup>1-3</sup> In brief, 1.0 g NaNO<sub>3</sub>, 1.0 g graphite and 40 mL H<sub>2</sub>SO<sub>4</sub> were mixed and stirred in a three neck flask in an acid bath, then 6 g KMnO<sub>4</sub> was added slowly. After that, the solution was transferred to a 35 °C water bath and stirred for ~1 h. Then 80 mL Milli-Q water was added and the solution was stirred for another 30 min at 90 °C. Then, 150 mL Milli-Q water and 6 mL H<sub>2</sub>O<sub>2</sub> (30%) was added slowly, the color of solution turned from dark brown to yellow. The solution was filtered and rinsed with 100 mL Milli-Q water. The as-prepared GO was further treated with 3 mol/L HNO<sub>3</sub>, which introduced hydrophilic functional groups (epoxy (C-O-C), hydroxyl (OH) and carboxyl (COOH)) at the surface of GO. The functionalized GO was further rinsed repeatedly with Milli-Q water to neutral pH values. The filter was vacuum dried and brown GO powder was thus obtained.

The MGO composites were synthesized by coprecipitation of FeCl<sub>3</sub>·6H<sub>2</sub>O and FeCl<sub>2</sub>·4H<sub>2</sub>O in the presence of GO. The mixed solution of FeCl<sub>3</sub> and FeCl<sub>2</sub> was added slowly to the GO solution, and ammonia solution was added quickly to precipitate Fe<sup>2+</sup>/Fe<sup>3+</sup> ions for the synthesis of magnetite (Fe<sub>3</sub>O<sub>4</sub>) particles. The temperature was raised to 85 °C, and a 30% ammonia solution was added to adjust the pH to 10. After being rapidly stirred for ~45 min, the solution was cooled to room temperature. The dark black colored solution was then filtered and rinsed with Milli-Q water/ethanol and dried in vacuum at 70 °C. The MGO composites were then prepared. The weight ratio of magnetite to GO was measured to be 4:1.<sup>1</sup>

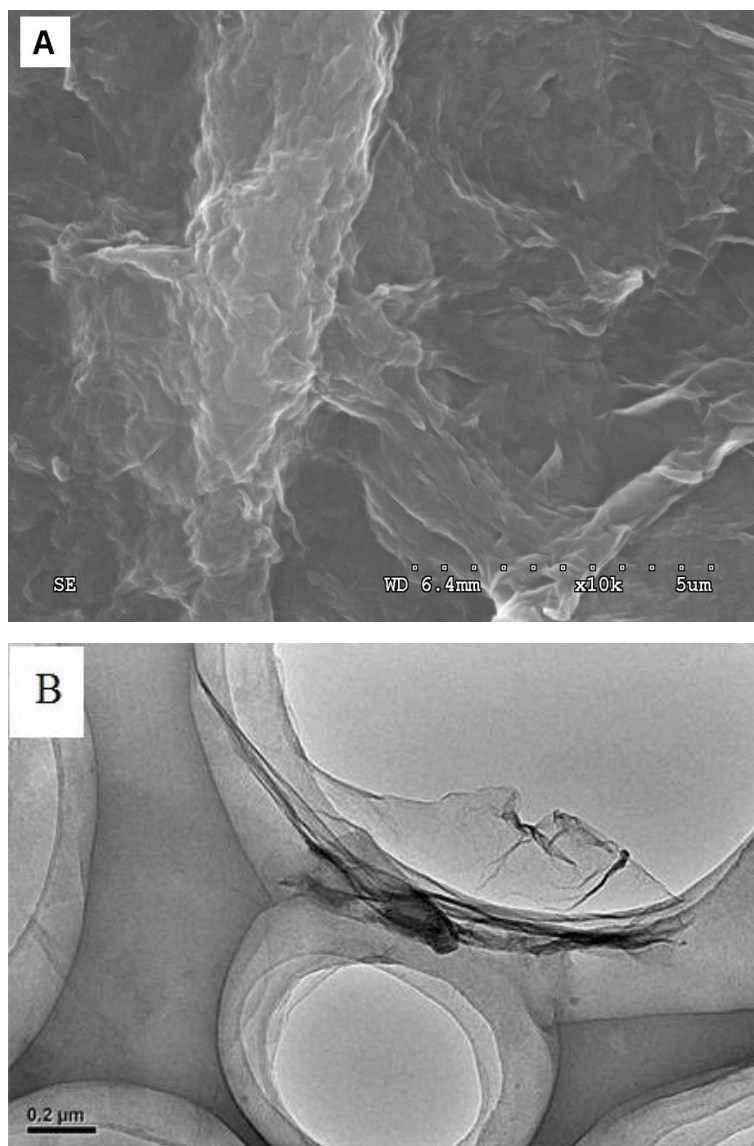

Fig. S1. (A) SEM and (B) TEM images of the GO sample.<sup>4,5</sup>

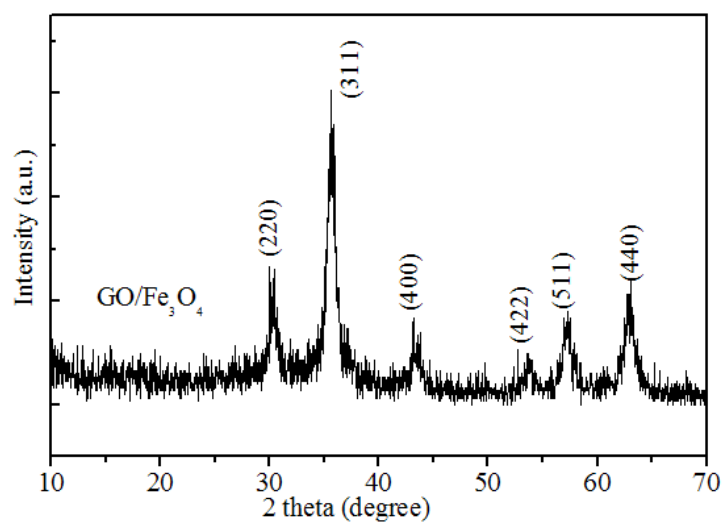

Fig. S2. XRD pattern of the MGO composites.<sup>6</sup>

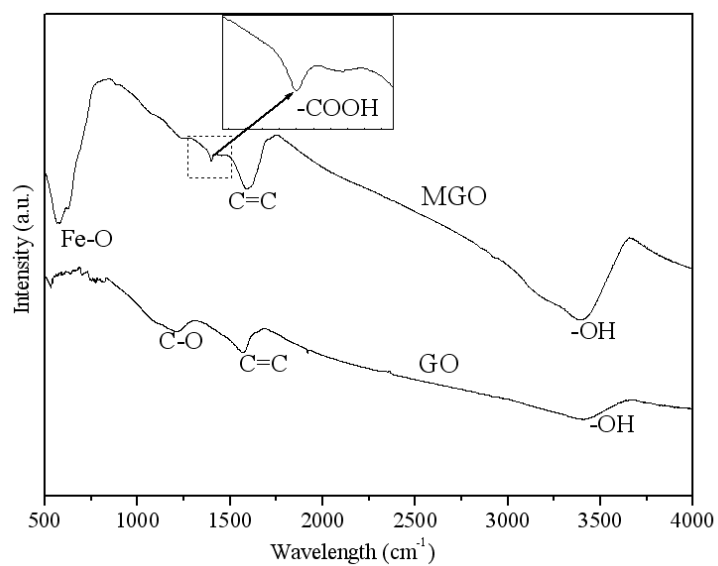

Fig. S3. FTIR spectra of the MGO composites<sup>6</sup> and GO samples.

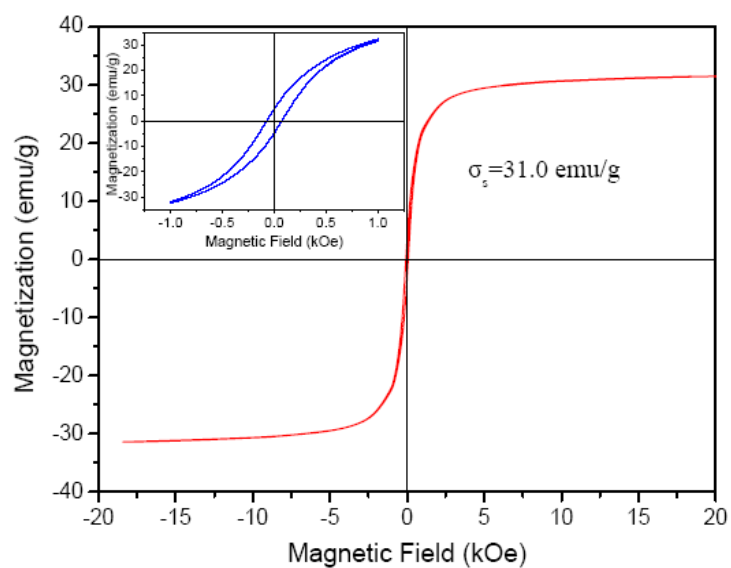

Fig. S4. Magnetization curve at room temperature of the MGO composites (Inset being separation of particles of MGO).<sup>6</sup>

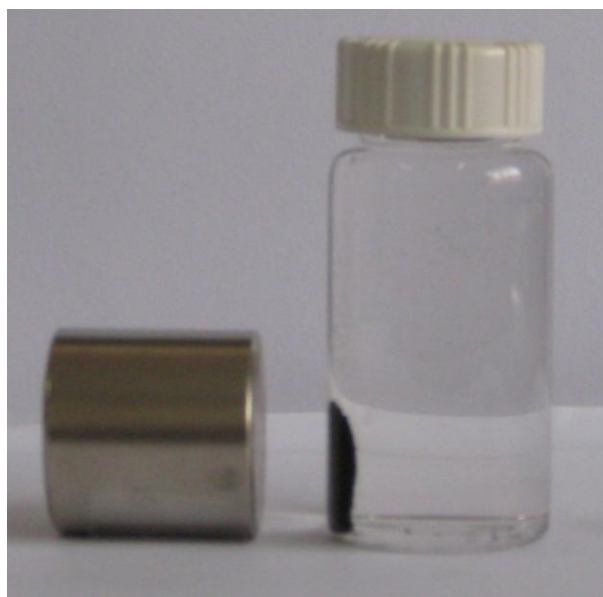

Fig. S5. Magnetic separation experiment of the MGO composites.

Table S1. Kinetic parameters of As(V) adsorption on MGO at pH=5.0 and 6.5.

| pH  | pseudo-second-order model |                     |       | intra-particle diffusion model |       |                         |       |
|-----|---------------------------|---------------------|-------|--------------------------------|-------|-------------------------|-------|
|     | $q_e$<br>( mg/g )         | $K_2$<br>(g/(mg·h)) | $R^2$ | $K_{p,1}$<br>(mg/(g·h))        | $R^2$ | $K_{p,2}$<br>(mg/(g·h)) | $R^2$ |
| 5.0 | 61.4                      | 0.02                | 0.997 | 27.1                           | 0.991 | 0.53                    | 0.911 |
| 6.5 | 29.5                      | 0.05                | 0.998 | 10.4                           | 0.988 | 0.52                    | 0.915 |

Table S2. Langmuir and Freundlich fitting parameters of As(V) adsorption on MGO.

| Conditions                                | Langmuir         |           |       | Freundlich                                   |      |       |
|-------------------------------------------|------------------|-----------|-------|----------------------------------------------|------|-------|
|                                           | $q_{max}$ (mg/g) | $B$ (L/g) | $R^2$ | $K_F ((\text{mg}^{1-n}\text{L}^n)/\text{g})$ | $n$  | $R^2$ |
| T = 298 K, GO                             | 80.1             | 0.06      | 0.989 | 8.6                                          | 0.53 | 0.967 |
| T = 298 K, MGO                            | 59.6             | 0.05      | 0.974 | 5.6                                          | 0.54 | 0.948 |
| T = 298 K, Fe <sub>3</sub> O <sub>4</sub> | 19.6             | 0.03      | 0.977 | 1.1                                          | 0.06 | 0.973 |
| T = 318 K, MGO                            | 63.2             | 0.07      | 0.972 | 8.9                                          | 0.47 | 0.932 |
| T = 338 K, MGO                            | 66.5             | 0.2       | 0.980 | 17.3                                         | 0.36 | 0.977 |



Table S3. Comparison of adsorption capacity of GO and MGO with other adsorbents for As(V).

| Adsorbents                                                         | Experimental conditions            | $q_{\max}$ (mg/g) | Ref.       |
|--------------------------------------------------------------------|------------------------------------|-------------------|------------|
| Activated carbon                                                   | pH=8.0, T=303 K, m/V=0.2 g/L       | 43.7              | 7          |
| Waste Fe(III)/Cr(III) hydroxide                                    | pH=4.0, T=305 K, m/V=10 g/L        | 11.0              | 8          |
| Iron coated pottery granules                                       | pH=7.0                             | 1.74              | 9          |
| hydrous titanium dioxide                                           | pH=4.0, T=293 K, m/V=0.1 g/L       | 33.4              | 10         |
| Fe <sub>3</sub> O <sub>4</sub> -MWNTs based electrodes             |                                    | 53.2              | 11         |
| Iron-containing mesoporous carbon                                  | pH=7.8, T=298 K, m/V=3.0 g/L       | 5.5               | 12         |
| Granular ferric hydroxide                                          | pH=6.5, T=293 K, I=0.02 mol/L NaCl | 3.1               | 13         |
| perlite/ $\alpha$ -MnO <sub>2</sub> nanocomposite                  | pH=7.0, T=293 K, m/V=2.0 g/L       | 7.1               | 14         |
| perlite/ $\gamma$ -Fe <sub>2</sub> O <sub>3</sub> nanocomposite    | pH=7.0, T=293 K, m/V=2.0 g/L       | 4.6               | 14         |
| Char-carbon                                                        | pH=7.5, T=298 K, m/V=5.0 g/L       | 30.5              | 15         |
| Granular TiO <sub>2</sub>                                          | pH=7.0, T=293 K, m/V=1.0 g/L       | 41.4              | 16         |
| Na-montmorillonite                                                 | pH=6.9, T=298 K, m/V=2.0 g/L       | 1.5               | 17         |
| AC-modified montmorillonite                                        | pH=6.9, T=298 K, m/V=2.0 g/L       | 3.4               | 17         |
| PAC <sub>20</sub> -modified montmorillonite                        | pH=6.9, T=298 K, m/V=2.0 g/L       | 3.6               | 17         |
| Al <sub>13</sub> -modified montmorillonite                         | pH=6.9, T=298 K, m/V=2.0 g/L       | 5.0               | 17         |
| Clinoptilolite zeolite                                             | pH=7.0, T=298 K, m/V=1 g/L         | 7.9               | 18         |
| MnO <sub>2</sub> -modified clinoptilolite zeolite                  | pH=7.0, T=298 K, m/V=1 g/L         | 33.8              | 18         |
| Fe-exchanged natural zeolite                                       | pH=6.0, T=298 K, m/V=0.2 g/L       | 50                | 19         |
| Fe(II)-modified clinoptilolite                                     | pH=7.0, T=296 K, m/V=0.2 g/L       | 40                | 20         |
| Fe(III)-modified clinoptilolite                                    | pH=7.0, T=298 K, m/V=0.25 g/L      | 44                | 21         |
| Fe <sup>2+</sup> oxide coated ethylenediamine functionalized MWCNT | pH=4.0, T=298 K, m/V=0.1 g/L       | 17.8              | 22         |
| Fe <sup>3+</sup> oxide coated ethylenediamine functionalized MWCNT | pH=4.0, T=298 K, m/V=0.1 g/L       | 10.4              | 22         |
| Iron-containing granular activated carbon                          | pH=4.7, T=298 K, m/V=3.0 g/L       | 6.6               | 23         |
| Iron-modified activated carbon                                     | pH=8.0, T=293 K, m/V=0.1 g/L       | 43.6              | 24         |
| GO                                                                 | pH=6.5, T=298 K, m/V=0.4 g/L       | 80.1              | This study |
| MGO                                                                | pH=6.5, T=298 K, m/V=0.4 g/L       | 59.6              | This study |

Table S4. Constants of linear fit of  $\ln K_d$  vs.  $q_e$  ( $\ln K_d=A+Bq_e$ ) for As(V) adsorption on MGO.

| $T$ (K) | A   | B       | R     |
|---------|-----|---------|-------|
| 298     | 8.2 | -0.0325 | 0.936 |
| 318     | 9.1 | -0.0413 | 0.963 |
| 338     | 9.9 | -0.0407 | 0.986 |

Table S5. Values of thermodynamic parameters for the adsorption of As(V) on MGO.

| $T$ (K) | $\Delta G^\circ$ (kJ·mol <sup>-1</sup> ) | $\Delta H^\circ$ (kJ·mol <sup>-1</sup> ) | $\Delta S^\circ$ (J·mol <sup>-1</sup> ·K <sup>-1</sup> ) |
|---------|------------------------------------------|------------------------------------------|----------------------------------------------------------|
| 298     | -20.4                                    | 35.2                                     | 189.9                                                    |
| 318     | -23.9                                    | 35.4                                     |                                                          |
| 338     | -27.9                                    | 36.2                                     |                                                          |

Table S6. The initial pH and final pH in the adsorption system of As(V) onto MGO.

|                       |      |      |      |      |      |      |      |      |      |      |      |      |       |       |       |
|-----------------------|------|------|------|------|------|------|------|------|------|------|------|------|-------|-------|-------|
| pH <sub>initial</sub> | 1.56 | 2.34 | 3.48 | 4.11 | 4.96 | 5.62 | 5.99 | 6.31 | 7.12 | 7.85 | 8.44 | 9.35 | 10.12 | 11.05 | 11.89 |
| pH <sub>final</sub>   | 1.60 | 2.41 | 3.55 | 4.22 | 5.02 | 5.68 | 6.06 | 6.37 | 6.76 | 7.33 | 7.95 | 8.46 | 9.78  | 10.12 | 10.55 |

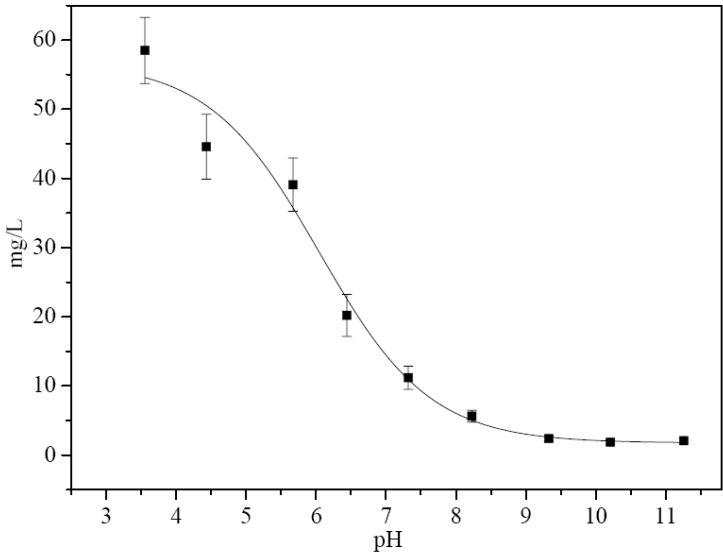

Fig. S6. The results of ferric ion dissolution experiment of the MGO composites as a function of solution pH, [MGO]<sub>0</sub>=5 g/L.

Table S7. Adsorption of As(V) on MGO at pH 5.0 and 6.5 in the absence and presence of inorganic anions with various concentrations, T=298 K,  $C_{[As(V)]}=25$  mg/L, m/V=0.4 g/L.

| Anion                          | $C_{\text{anion}}$ (mol/L) | pH=5.0                   |        | pH=6.5                   |        |
|--------------------------------|----------------------------|--------------------------|--------|--------------------------|--------|
|                                |                            | As(V) adsorbed<br>(mg/g) | IE (%) | As(V) adsorbed<br>(mg/g) | IE (%) |
| No anion                       | 0                          | 55.6                     |        | 27.6                     |        |
|                                | 0.001                      | 43.4                     | 21.9   | 21.9                     | 20.6   |
| F <sup>-</sup>                 | 0.01                       | 36.8                     | 33.8   | 18.3                     | 33.5   |
|                                | 0.1                        | 26.7                     | 52.0   | 13.9                     | 49.8   |
|                                | 0.001                      | 54.1                     | 2.7    | 26.9                     | 2.2    |
| Cl <sup>-</sup>                | 0.01                       | 53.8                     | 3.8    | 26.7                     | 3.3    |
|                                | 0.1                        | 52.3                     | 5.9    | 26.1                     | 5.4    |
|                                | 0.001                      | 54.7                     | 1.6    | 27.3                     | 1.1    |
| NO <sub>3</sub> <sup>-</sup>   | 0.01                       | 53.2                     | 4.3    | 26.9                     | 2.2    |
|                                | 0.1                        | 51.4                     | 7.5    | 26.4                     | 4.3    |
|                                | 0.001                      | 50.5                     | 9.1    | 25.8                     | 6.5    |
| SO <sub>4</sub> <sup>2-</sup>  | 0.01                       | 45.8                     | 17.7   | 23.7                     | 14.1   |
|                                | 0.1                        | 40.4                     | 27.4   | 20.4                     | 25.9   |
|                                | 0.001                      | 49.1                     | 11.8   | 25.2                     | 8.7    |
| HCO <sub>3</sub> <sup>-</sup>  | 0.01                       | 43.9                     | 20.9   | 22.5                     | 18.4   |
|                                | 0.1                        | 30.2                     | 29.5   | 20.7                     | 24.9   |
|                                | 0.001                      | 44.3                     | 20.4   | 23.4                     | 15.2   |
| HPO <sub>4</sub> <sup>2-</sup> | 0.01                       | 34.4                     | 38.1   | 17.1                     | 37.9   |
|                                | 0.1                        | 25.2                     | 54.7   | 12.7                     | 54.1   |

Table S8. Adsorption of As(V) on MGO at pH 5.0 and 6.5 in the absence and presence of organic anions with various concentrations, T=298 K,  $C_{[As(V)]}=25$  mg/L, m/V=0.4 g/L.

| Anion    | $C_{\text{anion}}$ (mg/L) | pH=5.0                   |        | pH=6.5                   |        |
|----------|---------------------------|--------------------------|--------|--------------------------|--------|
|          |                           | As(V) adsorbed<br>(mg/g) | IE (%) | As(V) adsorbed<br>(mg/g) | IE (%) |
| No anion | 0                         | 55.6                     |        | 27.6                     |        |
|          | 1                         | 48.5                     | 12.9   | 24.3                     | 11.9   |
| OA       | 10                        | 42.2                     | 24.1   | 21.0                     | 23.8   |
|          | 20                        | 37.4                     | 32.7   | 18.6                     | 32.5   |
| SA       | 1                         | 49.6                     | 10.7   | 25.2                     | 8.7    |
|          | 10                        | 43.9                     | 20.9   | 23.1                     | 16.3   |
|          | 20                        | 35.6                     | 35.9   | 19.8                     | 28.1   |
| MA       | 1                         | 47.9                     | 13.9   | 25.5                     | 7.6    |
|          | 10                        | 42.8                     | 23.1   | 22.2                     | 19.5   |
|          | 20                        | 38.0                     | 31.7   | 19.5                     | 20.2   |
| CA       | 1                         | 48.5                     | 12.9   | 24.6                     | 10.8   |
|          | 10                        | 43.4                     | 21.9   | 22.8                     | 17.3   |
|          | 20                        | 37.7                     | 32.2   | 20.1                     | 27.1   |
| HA       | 1                         | 42.5                     | 23.6   | 21.6                     | 21.6   |
|          | 10                        | 35.9                     | 35.4   | 18.0                     | 34.6   |
|          | 20                        | 26.7                     | 52.0   | 14.7                     | 46.5   |
| FA       | 1                         | 41.9                     | 24.7   | 22.5                     | 18.4   |
|          | 10                        | 34.4                     | 38.1   | 17.4                     | 36.8   |
|          | 20                        | 26.9                     | 51.5   | 13.9                     | 49.8   |

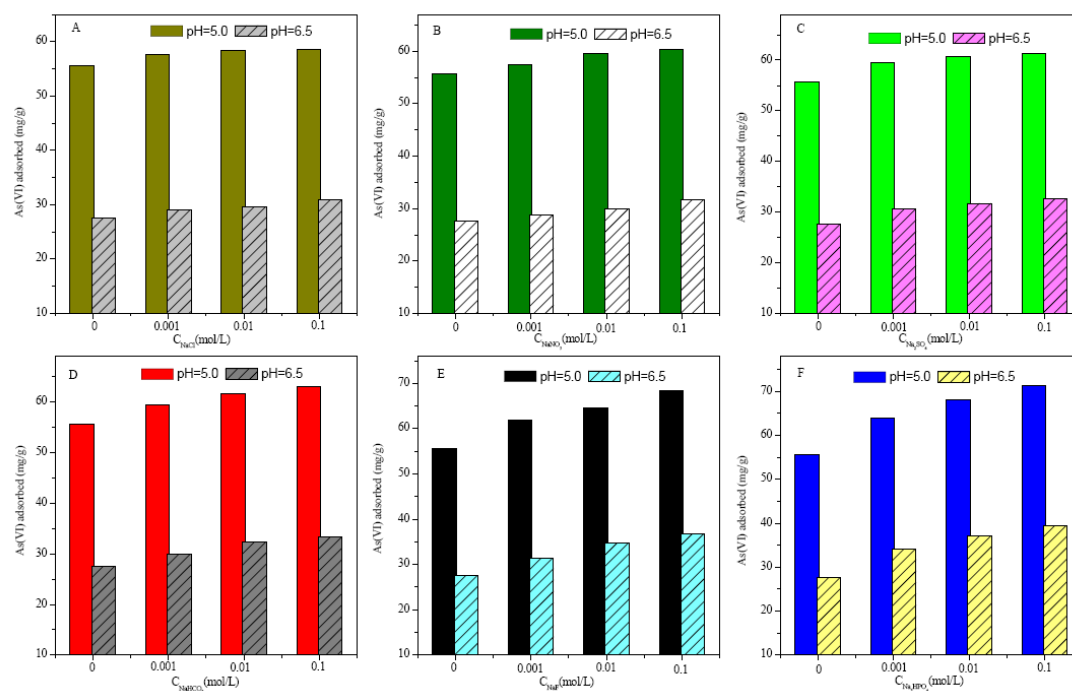

Fig. S7. Adsorption of As(V) on MGO at pH 5.0 and 6.5 in the absence and presence of coexisting cations with various concentrations,  $T=298\text{ K}$ ,  $C_{[As(V)]}=25\text{ mg/L}$ ,  $m/V=0.4\text{ g/L}$ , (A)  $K^+$ , (B)  $Na^+$ , (C)  $Ca^{2+}$ , (D)  $Mg^{2+}$ , (E)  $Al^{3+}$ , (F)  $Fe^{3+}$ .

Table S9. Adsorption of As(V) on MGO at pH 5.0 and 6.5 in the absence and presence of coexisting cations with various concentrations, T=298 K,  $C_{[As(V)]}=25$  mg/L, m/V=0.4 g/L.

| Cation    | $C_{\text{cation}}$ (mol/L) | pH=5.0                   |        | pH=6.5                   |        |
|-----------|-----------------------------|--------------------------|--------|--------------------------|--------|
|           |                             | As(V) adsorbed<br>(mg/g) | EE (%) | As(V) adsorbed<br>(mg/g) | EE (%) |
| No cation | 0                           | 55.6                     |        | 27.6                     |        |
| $K^+$     | 0.001                       | 57.7                     | 3.8    | 29.1                     | 5.4    |
|           | 0.01                        | 58.3                     | 4.8    | 29.7                     | 7.6    |
|           | 0.1                         | 58.6                     | 5.4    | 30.9                     | 11.9   |
| $Na^+$    | 0.001                       | 57.4                     | 3.2    | 28.8                     | 4.3    |
|           | 0.01                        | 59.5                     | 6.9    | 29.9                     | 8.7    |
|           | 0.1                         | 60.4                     | 8.6    | 31.8                     | 15.2   |
| $Ca^{2+}$ | 0.001                       | 59.5                     | 6.9    | 30.6                     | 10.8   |
|           | 0.01                        | 60.7                     | 9.1    | 31.8                     | 15.2   |
|           | 0.1                         | 61.3                     | 10.2   | 32.6                     | 18.4   |
| $Mg^{2+}$ | 0.001                       | 59.5                     | 6.9    | 29.9                     | 8.7    |
|           | 0.01                        | 61.6                     | 10.7   | 32.3                     | 17.3   |
|           | 0.1                         | 63.1                     | 13.4   | 33.2                     | 20.6   |
| $Al^{3+}$ | 0.001                       | 61.9                     | 11.3   | 31.5                     | 14.1   |
|           | 0.01                        | 64.6                     | 16.1   | 34.7                     | 25.9   |
|           | 0.1                         | 68.4                     | 23.1   | 36.8                     | 33.5   |
| $Fe^{3+}$ | 0.001                       | 63.9                     | 15.0   | 34.1                     | 23.8   |
|           | 0.01                        | 68.1                     | 22.5   | 37.1                     | 34.6   |
|           | 0.1                         | 71.4                     | 28.4   | 39.5                     | 43.3   |

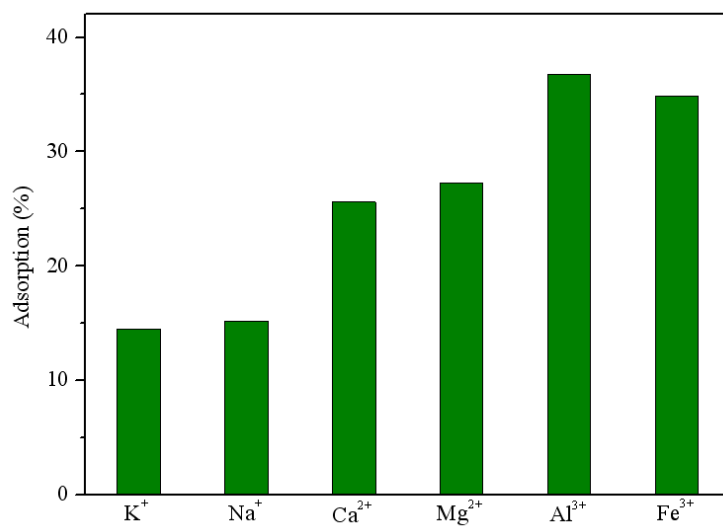

Fig. S8. Adsorption of cations (K<sup>+</sup>, Na<sup>+</sup>, Ca<sup>2+</sup>, Mg<sup>2+</sup>, Al<sup>3+</sup>, Fe<sup>3+</sup>) on MGO.



### Impact of Adsorbent Content

The impact of MGO content on As(V) adsorption at pH=5.0 and 6.5 is shown in Figure S3. It can be found that the adsorption capacity decreases with MGO content increasing. When the MGO content increases from 0.1 to 0.8 g/L, the adsorption capacity decreases from 133.5 mg/L to 25.8 mg/L at pH=5.0, and from 70.5 mg/L to 21.7 mg/L at pH=6.5, respectively. This phenomena can be attributed to the following factors: (1) a higher amount of MGO effectively reduces the unsaturation of the available sites and correspondingly, the number of such sites per unit mass comes down, which results in less adsorption at higher MGO content; (2) when MGO content is low, As(V) can easily access to the adsorbing sites and thus results in high  $q_e$  values. With the rise in MGO content, the corresponding increase in adsorption per unit mass is less because of lower adsorption capacity utilization of the adsorbent, which may be ascribed to overcrowding of particles that may be termed as a kind of solid concentration effect; (3) higher MGO content creates particle aggregation, resulting in a decrease in the total surface area and an increase in diffusional path length which contributes to the decrease in adsorption capacity.<sup>25</sup> The adsorption percentage (%) of As(V) increases with increasing MGO content. This is reasonable because the higher MGO content can provide more adsorbing sites and thereby increases As(V) adsorption.<sup>22</sup> From Figure S4, it is clear that the concentration of As(V) remained in solution decreases with MGO content increasing. When the MGO content increases from 0.1 to 0.8 g/L, the concentration of As(V) remained in solution decreases from 11.7 mg/L to 4.4 mg/L at pH=5.0, and from 17.9 mg/L to 7.7 mg/L at

pH=6.5, respectively. This is certainly a capacity effect.<sup>25</sup> The distribution coefficient ( $K_d$ ) does not change with MGO content increasing, which is consistent with the physicochemical properties of  $K_d$ , i.e., the  $K_d$  value is independent of solid content at low concentrations.<sup>1</sup>

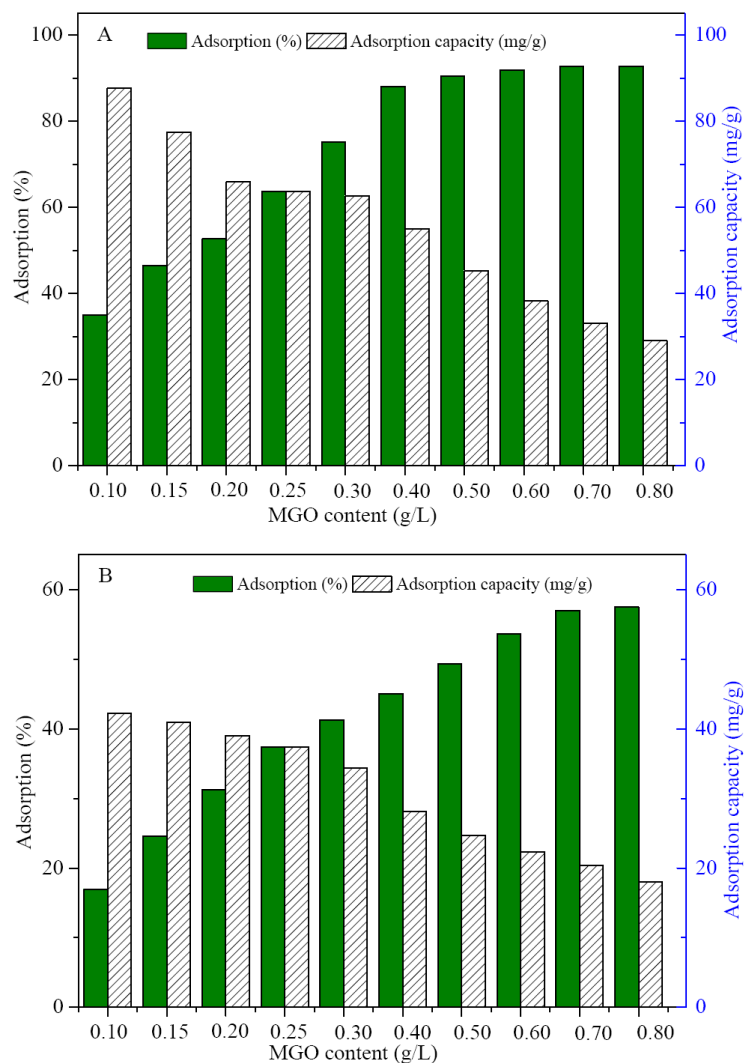

Fig. S9. Impact of adsorbent content on adsorption percentage and adsorption capacity of As(V) adsorption on MGO,  $C_{[As(V)]}=25$  mg/L,  $T=298$  K, (A) pH=5.0, (B) pH=6.5.

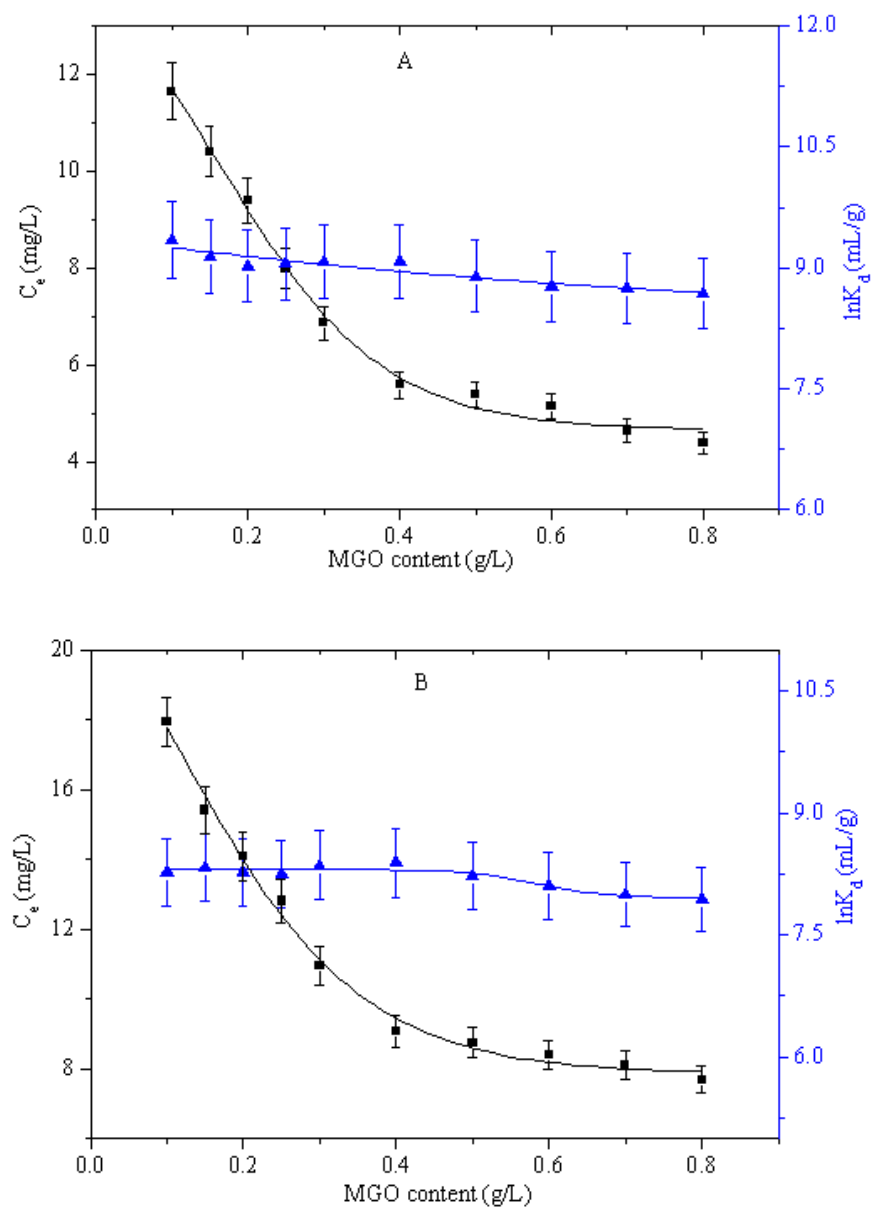

Fig. S10. Impact of adsorbent content on equilibrium concentration and distribution coefficient of As(V) adsorption on MGO,  $C_{[As(V)]}=25$  mg/L,  $T=298$  K, (A) pH=5.0, (B) pH=6.5.

## REFERENCES

- (1) Liu, M.; Chen, C.; Hu, J.; Wu, X.; Wang, X. Synthesis of magnetite/graphene oxide composite and application for cobalt(II) removal. *J. Phys. Chem. C* **2011**, *115*, 25234-25240.
- (2) Hummers, W. S.; Offeman, R. E. Preparation of graphitic oxide. *J. Am. Chem. Soc.* **1958**, *80*, 1339-1341.
- (3) Jahan, M.; Bao, Q. L.; Yang, J. X.; Loh, K. P. Structure-directing role of graphene in the synthesis of metal-organic framework nanowire. *J. Am. Chem. Soc.* **2010**, *132*, 14487-14495.
- (4) Zhao, G.; Li, J.; Ren, X.; Chen, C.; Wang, X. Few-layered graphene oxide nanosheets as superior sorbents for heavy metal ion pollution management. *Environ. Sci. Technol.* **2011**, *45*, 10454-10462.
- (5) Zhao, G.; Ren, X.; Gao, X.; Tan, X.; Li, J.; Chen, C.; Huang, Y.; Wang, X. Removal of Pb(II) ions from aqueous solutions on few-layered graphene oxide nanosheets. *Dalton Trans.* **2011**, *40*, 10945-40952.
- (6) Yang, X.; Chen, C.; Li, J.; Zhao, G.; Ren, X.; Wang, X. Graphene oxide-iron oxide and reduced graphene oxide-iron oxide hybrid materials for the removal of organic and inorganic pollutants. *RSC Adv.* DOI: 10.1039/c2ra20885g.
- (7) Liu, Z.; Zhang, F.; Sasai, R. Arsenate removal from water using Fe<sub>3</sub>O<sub>4</sub>-loaded activated carbon prepared from waste biomass. *Chem. Eng. J.* **2010**, *160*, 57-62.
- (8) Namasivayam, C.; Senthilkumar, S. Removal of arsenic(V) from aqueous solution using industrial solid waste: adsorption rates and equilibrium studies. *Ind. Eng. Chem.*

*Res.* **1998**, *37*, 4816-4822.

(9) Dong, L.; Zinin, P. V.; Cowen, J. P.; Ming, L. C. Iron coated pottery granules for arsenic removal from drinking water. *J. Hazard. Mater.* **2009**, *168*, 626-632.

(10) Pirilä, M.; Martikainen, M.; Ainassaari, K.; Kuokkanen, T.; Keiski, R. L. Removal of aqueous As(III) and As(V) by hydrous titanium dioxide. *J. Colloid Interf. Sci.* **2011**, *353*, 257-262.

(11) Mishra, A. K.; Ramaprabhu, S. Magnetite decorated multiwalled carbon nanotubes based super capacitor for arsenic removal and desalination of sea water. *J. Phys. Chem. C* **2010**, *114*, 2583-2590.

(12) Gu, Z.; Deng, B. Use of iron-containing mesoporous carbon (IMC) for arsenic removal from drinking water. *Environ. Eng. Sci.* **2007**, *24*, 113-121.

(13) Banerjee, K.; Amy, G. L.; Prevost, M.; Nour, S.; Jekel, M.; Gallagher, P. M. Kinetic and thermodynamic aspects of adsorption of arsenic onto granular ferric hydroxide (GFH). *Water Res.* **2008**, *42*, 3371-3378.

(14) Thanh, D. N.; Singh, M.; Ulbrich, P.; Strnadova, N.; Štěpánek, F. Perlite incorporating  $\gamma$ -Fe<sub>2</sub>O<sub>3</sub> and  $\alpha$ -MnO<sub>2</sub> nanomaterials: Preparation and evaluation of a new adsorbent for As(V) removal. *Sep. Purif. Technol.* **2011**, *82*, 93-101.

(15) Pattanayak, J.; Mondal, K.; Mathew, S.; Lalvani, S. B. A parametric evaluation of the removal of As(V) and As(III) by carbon-based adsorbents. *Carbon* **2000**, *38*, 589-596.

(16) Bang, S.; Patel, M.; Lippincott, L.; Meng, X. Removal of arsenic from groundwater by granular titanium dioxide adsorbent. *Chemosphere* **2005**, *60*,

389-397.

(17) Zhao, S.; Feng, C.; Huang, X.; Li, B.; Niu, J.; Shen, Z. Role of uniform pore structure and high positive charges in the arsenate adsorption performance of Al<sub>13</sub>-modified montmorillonite. *J. Hazard. Mater.* **2012**, 203-204, 317- 325.

(18) Camacho, L. M.; Parra, R. R.; Deng, S. Arsenic removal from groundwater by MnO<sub>2</sub>-modified natural clinoptilolite zeolite: Effects of pH and initial feed concentration. *J. Hazard. Mater.* **2011**, 189, 286-293.

(19) Li, Z.; Jean, J.; Jiang, W.; Chang, P.; Chen, C.; Li, L. Removal of arsenic from water using Fe-exchanged natural zeolite. *J. Hazard. Mater.* **2011**, 187, 318-323.

(20) Payne, K. B.; Abdel-Fattah, T. M. Adsorption of arsenate and arsenite by iron treated activated carbon and zeolites: Effects of pH, temperature, and ionic strength. *J. Environ. Sci. Health* **2005**, 40, 723-749.

(21) Habuda-Staniæ, M.; Kalajdzia, B.; Kuleš, M.; Velia, N. Arsenite and arsenate sorption by hydrous ferric oxide/polymeric material. *Desalination* **2008**, 229, 1-9.

(22) Velivckovic, Z.; Vukovic, G. D.; Marinkovic, A. D.; Moldovan, M. S.; Peric-Grujic, A. A.; Uskokovic, P. S.; Ristic, M. D. Adsorption of arsenate on iron(III) oxide coated ethylenediamine functionalized multiwall carbon nanotubes. *Chem. Eng. J.* **2012**, 181, 174-181.

(23) Gu, Z.; Fang, J.; Deng, B. Preparation and evaluation of GAC-based iron-containing adsorbents for arsenic removal. *Environ. Sci. Technol.* **2005**, 39, 3833-3843.

(24) Chen, W.; Parette, R.; Zou, J.; Cannon, F. S.; Dempsey, B. A. Arsenic removal by

iron modified activated carbon. *Water Res.* **2007**, *41*, 1851-1858.

(25) Sheng, G.; Hu, J.; Jin, H.; Yang, S.; Ren, X.; Li, J.; Chen, Y.; Wang, X. Effect of humic acid, fulvic acid, pH, ionic strength and temperature on  $^{63}\text{Ni}(\text{II})$  sorption to  $\text{MnO}_2$ . *Radiochimica Acta* **2010**, *98*, 291-299.
